# Supplementary material
Source: Research Square preprint supplement (doi:10.21203/rs.3.rs-8993843/v1)
Supplement: Supplementary file 1 [file 999ad90353904a01030669b0.docx]

Supplementary Table S1. Summary of reported successful pregnancies in dialysis patients (2012-2022).​

| Year | Authors | Dialysis vintage  (months) | Age | Gestational week | Dialysis regimen | Mode of delivery | Follow-up |
| --- | --- | --- | --- | --- | --- | --- | --- |
| 2012 | Baozhang Guan [1] | 7 | 22 | 34 | The HD frequency was increased to five sessions per week after 22 weeks of gestation. | Cesarean section | N/A |
| 2012 | Ling Li [2] | 2 | 25 | 35 | During the first 26 weeks of pregnancy, HD was performed twice weekly (5 hours per session), with monthly HDF sessions (5 hours each) using LMWH anticoagulation. In the subsequent 9 weeks, treatment intensity increased to thrice-weekly HD (5 hours per session) and biweekly HDF (5 hours per session), with heparin-free HD protocols implemented. | Vaginal delivery | N/A |
| 2013 | Cailin Wu [3] | 6 | 22 | 36+1 | HD was performed for 4 hours daily. | Cesarean section | N/A |
| 2015 | Panxi Yu [4] | 6 | 22 | 34 | Pregnancy was confirmed at 22 weeks of gestation, at which point the dialysis regimen was initiated at five sessions per week. The treatment frequency was subsequently increased to seven sessions per week beginning at 32 weeks' gestation. | Cesarean section | Healthy growth in 3 years |
| 2015 | Folan Li [5] | 3 | 30 | 34 | The patient was admitted at 32 weeks of gestation and received HD six times weekly, with each session lasting 4 hours. | Cesarean section | N/A |
| 2016 | [Ayse Seker](https://pubmed.ncbi.nlm.nih.gov/?term=Seker+A&cauthor_id=26956887) [6] | 8 | 28 | 32 | The dialysis regimen comprised six sessions per week, each lasting five hours. | Vaginal delivery | Healthy growth |
| 14 | 34 | 30 | Vaginal delivery | Discharged after 45 days in the ICU |
| 2018 | Hongmei Li [7] | 11 | 38 | 37 | 4 HD + 1 HDF weekly, each lasting 3.5 hours. | Cesarean section | Healthy growth in 1 year |
| 2018 | Qiaojing Xia [8] | 5 | 35 | 29 | The dialysis frequency was maintained at 3-4 sessions weekly before 12 weeks of gestation, increased to 5-6 sessions (3.5-4.0 hours each) during weeks 12-24, and uniformly intensified to 6 weekly sessions after 24 weeks' gestation. | Vaginal delivery | Healthy growth |
| 3 | 32 | 30 | Cesarean section | Healthy growth |
| 7 | 28 | 33 | Cesarean section | Healthy growth |
| 6 | 31 | 34 | Cesarean section | Healthy growth |
| 3 | 40 | 30 | Cesarean section | Growth retardation |
| 9 | 33 | 30 | Cesarean section | Cardiac malformation |
| 2018 | Houyong Dai [9] | 4 | 35 | 31+4 | Patients underwent hemodialysis 4-6 times weekly, with each 4-hour session conducted at blood flow rates of 200-240 mL/min and dialysate flow rates of 500 mL/min. | Cesarean section | Healthy growth in 1 year |
| 2018 | Lanfen Guo [10] | 11 | 38 | 37 | The dialysis regimen consisted of five weekly sessions (4 HD + 1 HDF), each lasting 3.5 hours. | Cesarean section | N/A |
| 2018 | Yun Cao [11] | 4 | 34 | 31+4 | The total weekly HD duration was increased from 12 to 20 hours, utilizing high-efficiency biocompatible membrane dialyzers with average blood flow rates maintained at 180-240 mL/min and dialysate flow at 500 mL/min. | Cesarean section | Healthy growth in 1 year |
| 2019 | Yan Li [12] | 6 | 32 | 36 | The treatment protocol consisted of four weekly HD sessions plus one HDF session, with each session lasting 3.5-4.5 hours. Blood flow rates were maintained at 200 mL/min with a dialysate flow rate of 500 mL/min throughout all procedures. | Vaginal delivery | Healthy growth |
| 2021 | Hongqiong Long [13] | 12 | 32 | 32 | HD frequency was intensified from three to six sessions weekly (5 HD + 1 HDF) following 21 weeks of gestation, with each session maintaining a 4-hour duration. | Cesarean section | Healthy growth in half year |
| 2021 | Lynn Heise [14] | - | 28 | 25 | The total weekly dialysis duration was maintained at 20 hours. | Cesarean section | N/A |
| 2022 | Dan Chen [15] | 6 | 33 | 27+5 | HD three times weekly (4 hours per session), with additional sessions implemented as clinically indicated. | Cesarean section | Healthy growth |

# References

1. Guan, B.; Yan, R.; Meng, Y.; Hu, B.; Liu, P.; Chen, Z.; Li, F.; Xiao, X.; Yin, L. Management of Pregnancy in Long-Term Hemodialysis (7 Years): Achieving Term Delivery at 34+4 Weeks - Clinical Lessons (Chinese Edition). *Chinese Journal of Nephrology* **2012**, *28*, 579, doi:10.3760/cma.j.issn.1001-7097.2012.07.020.

2. Li, L. Nursing Care for a Pregnant Patient on Maintenance Hemodialysis: A Case Report (Chinese Edition). *Chinese Journal of Blood Purification* **2012**, *11*, 579, doi:10.3969/j.issn.1671-4091.2012.10.015.

3. Wu, C.; Jiang, X.; Yin, L.; Xiao, X. Achieving Successful Pregnancy Outcome After 6 Years of Hemodialysis: A Case Study (Chinese Edition). *Chinese Journal of Obstetrics and Gynecology* **2013**, *48*, 72, doi:10.3760/cma.j.issn.0529-567x.2013.01.021.

4. Yu, P.; Diao, W.; Tang, Q.; Jiang, X. A successful pregnancy and parturition in a patient with anuria undergoing maintenance hemodialysis for 6 years: a case report of a 3-year-follow-up. *BMC Pregnancy Childbirth* **2015**, *15*, 218, doi:10.1186/s12884-015-0642-9.

5. Li, F.; Guan, B.; Zhu, H.; Zhong, Y.; Yu, H.; Cao, R. Nursing Challenges in High-Risk Pregnancy with Long-Standing Hemodialysis: Case Series of Two Patients (Chinese Edition). *Guangdong Medical Journal* **2015**, 3092-3092.

6. Seker, A. Two successive pregnancies in a patient during 14 years of hemodialysis: a case report. *J Med Case Rep* **2016**, *10*, 50, doi:10.1186/s13256-016-0836-4.

7. Li, H.; Zhao, Y.; Zhu, Y.; Tong, Z.; Sun, Y. Breaking the Barrier: Achieving Term Delivery Following 11 Years of Hemodialysis - A Clinically Significant Case (Chinese Edition). *Journal of Chinese Physician* **2018**, *20*, 305-306, doi:10.3760/cma.j.issn.1008-1372.2018.02.046.

8. Xia, Q.; Zhang, P.; Sheng, K.; Ren, P.; Song, Y.; Zhai, L.; Chen, J. Pregnancy Outcomes in Maintenance Hemodialysis: Institutional Experience (7 Cases) and Meta-Analysis of 169 Published Cases (Chinese Edition). *Chinese Journal of Nephrology* **2018**, *34*, 759-764, doi:10.3760/cma.j.issn.1001-7097.2018.10.007.

9. Dai, H.; Cao, B.; Gu, X.; Zhang, Y.; Wang, X.; Fan, Y. ​​Successful Obstetric Outcome in a Pregnancy Complicating Uremia and Maintenance Hemodialysis: Case Report​ (Chinese Edition). *Chinese Journal of Blood Purification* **2018**, *17*, 788-789, doi:10.3969/j.issn.1671-4091.2018.11.017.

10. Guo, L.; Xu, J.; Gao, X.; Sun, Y.; Pu, L. Nursing Management of Pregnancy in a Uremic Patient Receiving Maintenance Hemodialysis: A Case Study (Chinese Edition). *Chinese Journal of Nursing* **2018**, *53*, 756-758, doi:10.3761/j.issn.0254-1769.2018.06.025.

11. Cao, Y.; Zhang, Y.; Wang, X.; Zhang, Y.; Fan, Y.; Shi, H.; Dai, H. Successful pregnancy and delivery in uremic patients with maintenance hemodialysis: A case report. *Medicine (Baltimore)* **2018**, *97*, e13614, doi:10.1097/md.0000000000013614.

12. Li, Y. Spontaneous Delivery in a Maintenance Hemodialysis Patient: A Case Report​ (Chinese Edition). *Henan Medical Research* **2019**, *28*, 2879-2880, doi:10.3969/j.issn.1004-437X.2019.15.101.

13. Long, H.; Guo, L.; Mei, L. Nursing Management of an Unexpected Pregnancy in a Patient on Hemodialysis for 12 Years (Chinese Edition). *Journal of Nursing Science* **2021**.

14. Heise, L. Pregnancy in a Patient on Hemodialysis: The Importance of Interdisciplinary Communication. *Nephrol Nurs J* **2022**, *46*, 521-524.

15. Chen, D. Nursing Management of a Maintenance Hemodialysis Patient with Single Umbilical Artery in Pregnancy: A Case Report (Chinese Edition). *The Medical Forum* **2022**.
